# Supplementary material for: The neoliberal coloniality of EMI in Hong Kong higher education: insights from online stancetaking
Source: publisher site journal article supplement (doi:10.1515/applirev-2024-0145), 2024-11-01
Supplement: Supplementary file 1 [file j_applirev-2024-0145_suppl_001.pdf]

## Appendix

Post #1 by 你呀媽係彈彈波

| Translated version: |                                                                                                 |
|---------------------|-------------------------------------------------------------------------------------------------|
| 1                   | Posting this for a friend.                                                                      |
| 2                   |                                                                                                 |
| 3                   | Actually, HKU being disconnected from reality is nothing new.                                   |
| 4                   | I've just never thought that MSW (Master of Social Work), a supposedly down-to-earth            |
| 5                   | programme, could be so fucking disconnected from reality.                                       |
| 6                   | HKU only focuses on professional writing and barely teaches students practical skills. You can  |
| 7                   | even say those skills are pathetically little. In the last semester, we only got 6 lessons for  |
| 8                   | practising counselling skills in the casework course (and we didn't get to do the practices in  |
| 9                   | every single one of these lessons).                                                             |
| 10                  |                                                                                                 |
| 11                  | It's fine, that was just the first semester; we still get chances to practise.                  |
| 12                  | Okay, so there's this group work in this semester, and we were asked to write a very            |
| 13                  | unrealistic group proposal, so unrealistic that we were even asked to explain why it had to be  |
| 14                  | done in the form of group work. I was like, come on, it was you who asked us to do this group   |
| 15                  | work; why do I have to explain it? Also, there're a ton of studies saying the topic we're doing |
| 16                  | should better be done individually. How are you expecting me to explain it?                     |
| 17                  |                                                                                                 |
| 18                  | Never mind. I take it as a chance to learn the theories behind; and in the future I may write   |
| 19                  | better proposals to get funding.                                                                |
| 20                  | But still, I just want to write something more practical, something actually helpful to our     |
| 21                  | clients.                                                                                        |
| 22                  |                                                                                                 |

|    |                                                                                                   |
|----|---------------------------------------------------------------------------------------------------|
| 23 | Well, we all live in Hong Kong. We just want Hong Kong to be a better place, especially for       |
| 24 | social workers, who are so down-to-earth.                                                         |
| 25 | Although there're a lot more English-speaking clients these days, in most cases, we use           |
| 26 | Cantonese to communicate with our co-workers and clients. In this sense, I really think we        |
| 27 | should use Cantonese, not English, for counselling [practice].                                    |
| 28 | However, there're an ethnic minority (EM) student and a student from the mainland in our          |
| 29 | class, making it impossible to use a down-to-earth language in group work practice.               |
| 30 |                                                                                                   |
| 31 | 1. Although we're all university students whose English level's surely fine, has it occurred to   |
| 32 | you that what we're doing is learning practical skills of a profession, but not chatting casually |
| 33 | or doing ordinary presentations?                                                                  |
| 34 | If we're doing it in English, how can the vast majority of the students (99%) apply what          |
| 35 | they've learnt in their job in the future? They're also not able to learn what they should        |
| 36 | learn.                                                                                            |
| 37 |                                                                                                   |
| 38 | 2. Some students pointed out that the University states explicitly that the medium of             |
| 39 | instruction is English, but this proved not to be the case, because in the previous few cohorts,  |
| 40 | both Chinese and English were used in skill practice.                                             |
| 41 | For us, we could use Cantonese in the casework [practice] in the last semester, and it went       |
| 42 | fairly well. So what's wrong?                                                                     |
| 43 | If we're sticking to this principle, why were there exceptional cases?                            |
| 44 | So, this argument doesn't stand.                                                                  |
| 45 |                                                                                                   |
| 46 | 3. Some argued that this is discrimination.                                                       |
| 47 | They asked why there're only English and Cantonese for us to choose from, but not Hindi or        |

|    |                                                                                                 |
|----|-------------------------------------------------------------------------------------------------|
| 48 | Mandarin.                                                                                       |
| 49 | If not using English in classes means discrimination, should we, the Cantonese speakers, learn  |
| 50 | their mother languages to accommodate them?                                                     |
| 51 | Again, as a future social worker in Hong Kong, why are you not learning the local culture and   |
| 52 | language, but expecting us locals to accommodate you?                                           |
| 53 | Why are you morally blackmailing us here?                                                       |
| 54 | Why does/do the EM [student(s)] always feel like being discriminated against by us?             |
| 55 | We really don't mean it like that.                                                              |
| 56 | We just want to learn better. You say you aren't learning well in Chinese, but indeed we're     |
| 57 | not learning the skills well in English either.                                                 |
| 58 | Our primary focus is learning. Please don't morally blackmail all the time and play the race    |
| 59 | card when any issue arises.                                                                     |
| 60 |                                                                                                 |
| 61 | 4. Some said this involves equity and equality.                                                 |
| 62 | Some said using entirely Chinese or English is being fair, which I disagree with.               |
| 63 | When it comes to equity, if we're all using English, it'll be really unfair to those with poor  |
| 64 | Chinese [English], and a great advantage to those with fluent English.                          |
| 65 | So, does equity mean we're catering for people? Are all social workers expected to be           |
| 66 | morally blackmailed like this?                                                                  |
| 67 |                                                                                                 |
| 68 | If you really have the heart to serve Hong Kong people as a frontline social worker, instead of |
| 69 | a senior clerk working for the government, I think you'd better not consider this university.   |
| 70 |                                                                                                 |
| 71 | There's no absolute fairness in this world, and I really don't understand why just the two      |

|    |                                                                                                                                                               |
|----|---------------------------------------------------------------------------------------------------------------------------------------------------------------|
| 72 | students are favoured over the vast majority. There're better solutions. Some students can                                                                    |
| 73 | act as the clients in the practical skills assessment, and so we can all use our mother tongue.                                                               |
| 74 |                                                                                                                                                               |
| 75 |  Training of social workers should be down-to-earth.                         |
| 76 |  Shut up. Just use English. It's just that the post creator's English sucks. |
